# Supplementary material
Source: PubMed Central journal article supplement (PMC2910588)
Supplement: NIHMS215841-supplement-Xu-Suppl.pdf [file NIHMS215841-supplement-Xu-Suppl.pdf]

## **Supplemental data**

### **Tyrosine nitration of PA700 activates the 26S proteasome to induce endothelial dysfunction in mice with angiotensin II-induced hypertension**

Jian Xu, PhD; Shuangxi Wang, MD, PhD; Yong Wu, MD, PhD; Ping Song, PhD; Ming-Hui Zou, MD, PhD<sup>‡</sup>

Division of Endocrinology and Diabetes, Department of Medicine, University of Oklahoma Health Sciences Center, Oklahoma City, OK 73104, USA

#### **Figure Legends**

##### **Figure 1**

Key findings made in HUVECs are reproducible in human arterial originated microvascular endothelial cell (HMVEC). Acute exposure of HMVEC to Ang II induces (A) MG132-inhibitable reduction of GTPCH I protein and (B) total biopterins and BH4 levels; Ang II also increases (C) PA700 nitration without altering its protein levels; and (D) 26S proteasome activity. The blots in (A) and (C) are representatives of three independent experiments, respectively. Results (n=3, respectively) were analyzed with a one-way ANOVA; n.s. for not significant.

##### **Figure 2**

Ang II elevates blood pressure in mice. Mice were infused with Ang II (0.85 mg/kg/day for 14 d) or Vehicle (saline) (n = 6/group). Results (n=6) were analyzed with ANOVA.

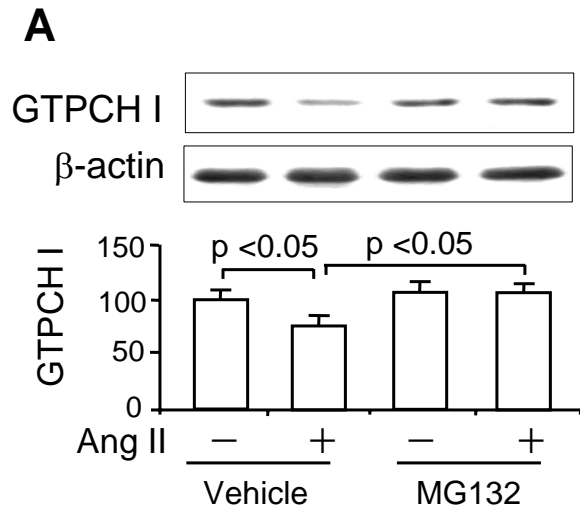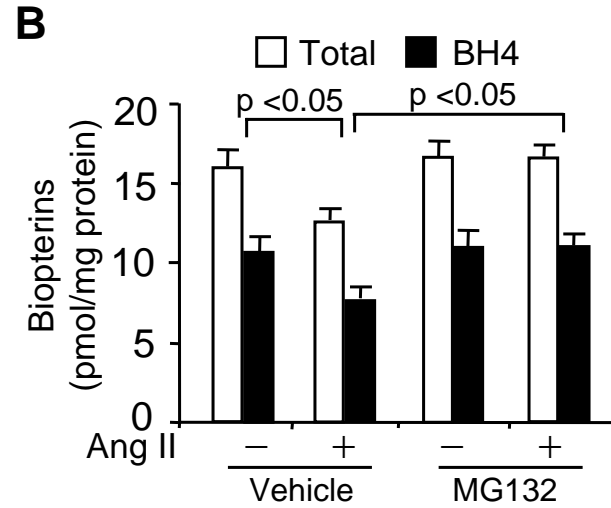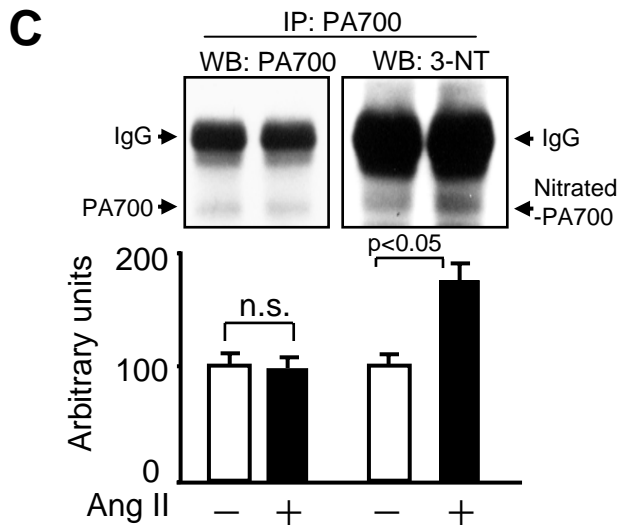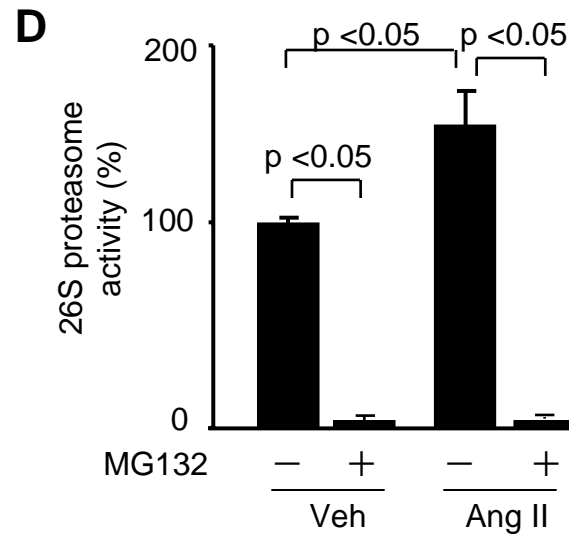

**Supplement Figure 1**

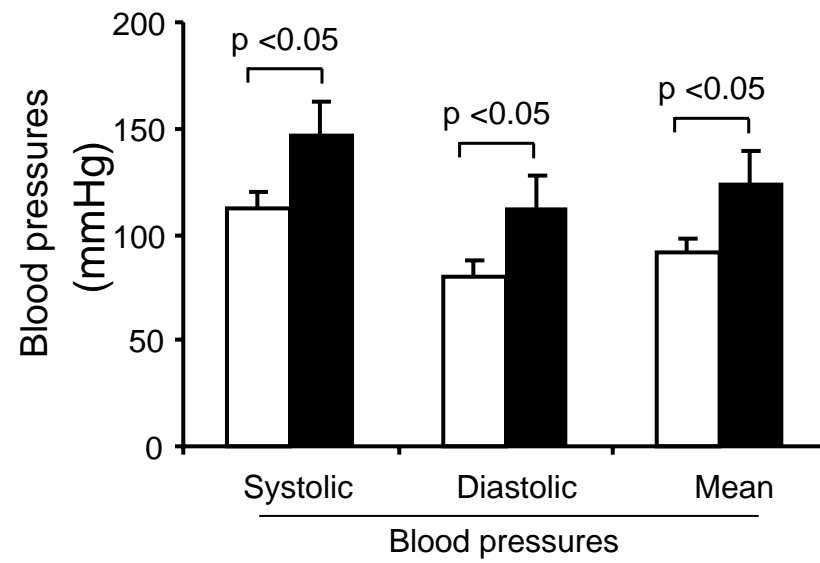

**Supplement Figure 2**
